# Supplementary material for: Leptospira infection in rats: A literature review of global prevalence and distribution
Source: PLoS Negl Trop Dis. 2019 Aug 9;13(8):e0007499. doi: 10.1371/journal.pntd.0007499 (PMC6688788; doi:10.1371/journal.pntd.0007499)
Supplement: S3 Table — (XLSX) [file pntd.0007499.s003.xlsx]

## Sheet: Sheet1
S3 Table. Distribution of Leptospira serovars reported, sorted by continents.
Oceania		Australia	Fiji	Hawaii	New Caledonia	New Zealand
Serogroups	Serovars	Milner et al. (1981)	Collings (1984)	Desvars et al. (2011); Higa & Fujinaka (1976); Shimizu (1984); Wong et al. (2012)	Perez et al. (2011); Desvars et al. (2011)	Carter & Cordes (1980); Hathaway & Blackmore (1981); Hathaway et al. (1981)
Pathogenic	Pathogenic
Australis	Australis	X	X	X
Australis	Bratislava		X
Autumnalis	Autumnalis		X
Autumnalis	Bim
Ballum	Arborea
Ballum	Ballum	X	X	X	X	X
Ballum	Castellonis
Bataviae	Bataviae		X
Bataviae	Losbanos
Canicola	Canicola				X
Canicola	Kuwait
Celledoni	Celledoni
Celledoni	Whitcombi
Cynopteri	Cynopteri
Djasiman	Djasiman
Djasiman	Sentot
Grippotyphosa	Grippotyphosa
Grippotyphosa	Ratnapura
Grippotyphosa	Valbuzzi
Hebdomadis	Hebdomadis
Hurstbridge	Hurstbridge
Icterohaemorrhagiae	Copenhageni		X			X
Icterohaemorrhagiae	Icterohaemorrhagiae			X	X
Icterohaemorrhagiae	Lai
Icterohaemorrhagiae	Mankarso
Javanica	Javanica
Javanica	Poi
Louisiana	Louisiana
Mini	Mini
Mini	Szwajizak
Panama	Magnus
Panama	Panama
Pomona	Pomona		X			X
Pyrogenes	Manilae
Pyrogenes	Pyrogenes		X
Sejroë	Hardjo					X
Pyrogenes	Hardjo-minis
Sejroë	Hardjominiswajezak
Sejroë	Istrica
Sejroë	Sejroë			X
Sejroë	Wolffi
Shermani	Shermani
Tarassovi	Hyos
Tarassovi	Tarassovi					X
(Unknown)	Varillal
Saprophytic	Saprophytic
Andamana	Andamana
Semaranga	Patoc
Semaranga	Semaranga
Asia		China	India	Japan	Malaysia	Philippines	South Korea	Sri Lanka	Thailand	Vietnam
Serogroups	Serovars	Yalin et al. (2011)	Bojiraj et al. (2017); Koteeswaran (2006); Kuriakose et al. (2008); Lahiri (1941); Natarajaseenivasan et al. (2002); Natarajaseenivasan et al. (2011); Parveen et al. (2016); Priya et al. (2007); Sharma et al. (2003); Vedhagiri et al. (2010)	Kobayashi et al. (1972); Koizumi et al. (2009); Saito et al. (2015)	Benacer et al. (2013); Benacer et al. (2016); Mohamed-Hassan et al. (2010); Pui et al. (2017); Smith et al. (1961)	Villanueva et al. (2010); Villanueva et al. (2016)	Rim et al. (1993)	Denipitiya et al. (2017); Gamage et al. (2011)	Doungchawee et al. (2005); Kositanont et al. (2003)	Loan et al. (2015)
Pathogenic	Pathogenic
Australis	Australis		X		X	X			X	X
Australis	Bratislava								X
Autumnalis	Autumnalis		X	X	X	X			X	X
Autumnalis	Bim
Ballum	Arborea
Ballum	Ballum				X				X
Ballum	Castellonis
Bataviae	Bataviae		X		X				X	X
Bataviae	Losbanos					X
Canicola	Canicola		X		X	X	X			X
Canicola	Kuwait
Celledoni	Celledoni
Celledoni	Whitcombi
Cynopteri	Cynopteri									X
Djasiman	Djasiman				X
Djasiman	Sentot
Grippotyphosa	Grippotyphosa		X	X	X	X
Grippotyphosa	Ratnapura					X
Grippotyphosa	Valbuzzi
Hebdomadis	Hebdomadis			X	X	X			X
Hurstbridge	Hurstbridge									X
Icterohaemorrhagiae	Copenhageni			X		X		X	X	X
Icterohaemorrhagiae	Icterohaemorrhagiae	X	X	X	X	X		X	X	X
Icterohaemorrhagiae	Lai
Icterohaemorrhagiae	Mankarso
Javanica	Javanica		X	X	X			X	X	X
Javanica	Poi					X
Louisiana	Louisiana									X
Mini	Mini
Mini	Szwajizak
Panama	Panama									X
Panama	Magnus
Pomona	Pomona		X	X		X			X	X
Pyrogenes	Manilae					X
Pyrogenes	Pyrogenes		X	X	X				X	X
Sejroë	Hardjo		X			X
Pyrogenes	Hardjo-minis
Sejroë	Hardjominiswajezak
Sejroë	Istrica
Sejroë	Sejroë								X
Sejroë	Wolffi								X
Shermani	Shermani
Tarassovi	Hyos				X
Tarassovi	Tarassovi					X			X	X
(Unknown)	Varillal
Saprophytic	Saprophytic
Andamana	Andamana				X
Semaranga	Patoc			X		X			X	X
Semaranga	Semaranga					X
Middle East		Iran	Israel	Kuwait	Lebanon	Turkey
Serogroups	Serovars	Esfandiari et al. (2015)	Lindenbaum & Eylan (1982); Van der Hoeden & Szenberg (1964)	Bezjak & Thorburn (1983)	Kalfayan et al. (1947)	Sunbul et al. (2001)
Pathogenic	Pathogenic
Australis	Australis	X
Australis	Bratislava					X
Autumnalis	Autumnalis	X				X
Autumnalis	Bim
Ballum	Arborea
Ballum	Ballum	X	X
Ballum	Castellonis
Bataviae	Bataviae		X
Bataviae	Losbanos
Canicola	Canicola			X
Canicola	Kuwait
Celledoni	Celledoni
Celledoni	Whitcombi
Cynopteri	Cynopteri	X
Djasiman	Djasiman
Djasiman	Sentot
Grippotyphosa	Grippotyphosa	X	X
Grippotyphosa	Ratnapura
Grippotyphosa	Valbuzzi
Hebdomadis	Hebdomadis		X
Hurstbridge	Hurstbridge
Icterohaemorrhagiae	Copenhageni	X
Icterohaemorrhagiae	Icterohaemorrhagiae	X	X		X	X
Icterohaemorrhagiae	Lai	X
Icterohaemorrhagiae	Mankarso
Javanica	Javanica
Javanica	Poi
Louisiana	Louisiana
Mini	Mini
Mini	Szwajizak		X
Panama	Magnus
Panama	Panama
Pomona	Pomona
Pyrogenes	Manilae
Pyrogenes	Pyrogenes
Sejroë	Hardjo	X				X
Pyrogenes	Hardjo-minis
Sejroë	Hardjominiswajezak
Sejroë	Istrica
Sejroë	Sejroë	X
Sejroë	Wolffi
Shermani	Shermani
Tarassovi	Hyos
Tarassovi	Tarassovi
(Unknown)	Varillal
Saprophytic	Saprophytic
Andamana	Andamana		X
Semaranga	Patoc
Semaranga	Semaranga		X
Africa		Canary Islands	Egypt	Madagascar	Réunion
Serogroups	Serovars	Foronda et al. (2011)	Samir et al. (2015)	Rahelinirina et al. (2010)	Desvars et al. (2013); Pagès et al. (2016)
Pathogenic	Pathogenic
Australis	Australis
Australis	Bratislava
Autumnalis	Autumnalis
Autumnalis	Bim
Ballum	Arborea
Ballum	Ballum
Ballum	Castellonis
Bataviae	Bataviae
Bataviae	Losbanos
Canicola	Canicola		X	X	X
Canicola	Kuwait			X
Celledoni	Celledoni		X
Celledoni	Whitcombi
Cynopteri	Cynopteri				X
Djasiman	Djasiman
Djasiman	Sentot
Grippotyphosa	Grippotyphosa		X
Grippotyphosa	Ratnapura
Grippotyphosa	Valbuzzi
Hebdomadis	Hebdomadis
Hurstbridge	Hurstbridge
Icterohaemorrhagiae	Copenhageni	X
Icterohaemorrhagiae	Icterohaemorrhagiae		X		X
Icterohaemorrhagiae	Lai
Icterohaemorrhagiae	Mankarso
Javanica	Javanica
Javanica	Poi
Louisiana	Louisiana
Mini	Mini				X
Mini	Szwajizak
Panama	Magnus
Panama	Panama				X
Pomona	Pomona		X
Pyrogenes	Manilae
Pyrogenes	Pyrogenes
Sejroë	Hardjo
Pyrogenes	Hardjo-minis
Sejroë	Hardjominiswajezak
Sejroë	Istrica
Sejroë	Sejroë				X
Sejroë	Wolffi
Shermani	Shermani
Tarassovi	Hyos
Tarassovi	Tarassovi
(Unknown)	Varillal
Saprophytic	Saprophytic
Andamana	Andamana
Semaranga	Patoc
Semaranga	Semaranga
Europe		Azores	Denmark	Finland	France	Italy	Spain	Sweden	United Kingdom
Serogroups	Serovars	Collares-Pereira et al. (1997); Collares-Pereira et al. (2000)	Krøjgaard et al. (2009)	Rislakki & Salminen (1955)	Aviat et al. (2009); Ayral et al. (2015b); Zilber et al. (2016)	Amaddeo et al. (1996); Pezzella et al. (2004)	Millán et al. (2018)	Strand et al. (2015)	Broom & Gibson (1953)a; Michna & Ellis (1974); Middleton (1929); Webster et al. (1995)
Pathogenic	Pathogenic
Australis	Australis
Australis	Bratislava								X
Autumnalis	Autumnalis
Autumnalis	Bim
Ballum	Arborea	X
Ballum	Ballum	X				X			X
Ballum	Castellonis
Bataviae	Bataviae
Bataviae	Losbanos
Canicola	Canicola
Canicola	Kuwait
Celledoni	Celledoni
Celledoni	Whitcombi
Cynopteri	Cynopteri				X
Djasiman	Djasiman
Djasiman	Sentot
Grippotyphosa	Grippotyphosa
Grippotyphosa	Ratnapura
Grippotyphosa	Valbuzzi
Hebdomadis	Hebdomadis
Hurstbridge	Hurstbridge
Icterohaemorrhagiae	Copenhageni				X
Icterohaemorrhagiae	Icterohaemorrhagiae	X	X	X	X	X	X	X	X
Icterohaemorrhagiae	Lai
Icterohaemorrhagiae	Mankarso
Javanica	Javanica
Javanica	Poi
Louisiana	Louisiana
Mini	Mini
Mini	Szwajizak
Panama	Magnus				X
Panama	Panama
Pomona	Pomona		X
Pyrogenes	Manilae
Pyrogenes	Pyrogenes
Sejroë	Hardjo
Pyrogenes	Hardjo-minis
Sejroë	Hardjominiswajezak
Sejroë	Istrica							X
Sejroë	Sejroë	X	X		X
Sejroë	Wolffi
Shermani	Shermani
Tarassovi	Hyos
Tarassovi	Tarassovi
(Unknown)	Varillal
Saprophytic	Saprophytic
Andamana	Andamana
Semaranga	Patoc
Semaranga	Semaranga
aAssumed (sg Icterohaemorrhagiae sv Icterohaemorrhagiae)
North America		Canada	Mexico	United States of America
Serogroups	Serovars	McKiel et al. (1961)	Montes et al. (2002); Vado-Solis et al. (2002)	Easterbrook et al. (2007); Li & Davis (1952); Sulzer et al. (1968)
Pathogenic	Pathogenic
Australis	Australis
Australis	Bratislava		X
Autumnalis	Autumnalis
Autumnalis	Bim
Ballum	Arborea
Ballum	Ballum
Ballum	Castellonis
Bataviae	Bataviae
Bataviae	Losbanos
Canicola	Canicola
Canicola	Kuwait
Celledoni	Celledoni
Celledoni	Whitcombi
Cynopteri	Cynopteri
Djasiman	Djasiman
Djasiman	Sentot
Grippotyphosa	Grippotyphosa		X
Grippotyphosa	Ratnapura
Grippotyphosa	Valbuzzi
Hebdomadis	Hebdomadis
Hurstbridge	Hurstbridge
Icterohaemorrhagiae	Copenhageni			X
Icterohaemorrhagiae	Icterohaemorrhagiae	X	X	X
Icterohaemorrhagiae	Lai
Icterohaemorrhagiae	Mankarso
Javanica	Javanica
Javanica	Poi
Louisiana	Louisiana
Mini	Mini
Mini	Szwajizak
Panama	Magnus
Panama	Panama
Pomona	Pomona
Pyrogenes	Manilae
Pyrogenes	Pyrogenes
Sejroë	Hardjo		X
Pyrogenes	Hardjo-minis
Sejroë	Hardjominiswajezak
Sejroë	Istrica
Sejroë	Sejroë
Sejroë	Wolffi		X
Shermani	Shermani
Tarassovi	Hyos
Tarassovi	Tarassovi		X
(Unknown)	Varillal
Saprophytic	Saprophytic
Andamana	Andamana
Semaranga	Patoc
Semaranga	Semaranga
Central America/Caribbean		Barbados	Grenada	Guadeloupe	Trinidad
Serogroups	Serovars	Desvars et al. (2011); Taylor et al. (1991); Levett et al. (1998)	Keenan et al. (2009)	Desvars et al. (2011)	Desvars et al. (2011); Everard et al. (1983); Suepaul et al. (2010); Suepaul et al. (2014)
Pathogenic	Pathogenic
Australis	Australis
Australis	Bratislava
Autumnalis	Autumnalis	X			X
Autumnalis	Bim	X
Ballum	Arborea	X
Ballum	Ballum		X		X
Ballum	Castellonis
Bataviae	Bataviae
Bataviae	Losbanos
Canicola	Canicola
Canicola	Kuwait
Celledoni	Celledoni
Celledoni	Whitcombi
Cynopteri	Cynopteri		X
Djasiman	Djasiman
Djasiman	Sentot
Grippotyphosa	Grippotyphosa
Grippotyphosa	Ratnapura
Grippotyphosa	Valbuzzi
Hebdomadis	Hebdomadis				X
Hurstbridge	Hurstbridge
Icterohaemorrhagiae	Copenhageni	X	X		X
Icterohaemorrhagiae	Icterohaemorrhagiae	X	X	X	X
Icterohaemorrhagiae	Lai
Icterohaemorrhagiae	Mankarso		X		X
Javanica	Javanica				X
Javanica	Poi
Louisiana	Louisiana				X
Mini	Mini
Mini	Szwajizak
Panama	Magnus
Panama	Panama
Pomona	Pomona
Pyrogenes	Manilae
Pyrogenes	Pyrogenes
Sejroë	Hardjo
Pyrogenes	Hardjo-minis
Sejroë	Hardjominiswajezak
Sejroë	Istrica
Sejroë	Sejroë
Sejroë	Wolffi
Shermani	Shermani
Tarassovi	Hyos
Tarassovi	Tarassovi
(Unknown)	Varillal
Saprophytic	Saprophytic
Andamana	Andamana
Semaranga	Patoc
Semaranga	Semaranga
South America		Argentina	Brazil	Colombia	Peru
Serogroups	Serovars	Scialfa et al. (2010); Vanasco et al. (2000); Vanasco et al. (2003)	Costa et al. (2014)a; de Faria et al. (2008); Lilenbaum et al. (1993); Martins & Lilenbaum (2013); Paixão et al. (2014); Pellizzaro et al. (2017)	Agudelo-Florez et al. (2009); Agudelo-Florez et al. (2010); Morales et al. (1978); Romero-Vivas et al. (2013)	Matthias et al. (2008)
Pathogenic	Pathogenic
Australis	Australis		X	X
Australis	Bratislava			X
Autumnalis	Autumnalis		X
Autumnalis	Bim
Ballum	Arborea	X
Ballum	Ballum		X	X
Ballum	Castellonis	X	X	X
Bataviae	Bataviae
Bataviae	Losbanos
Canicola	Canicola	X		X
Canicola	Kuwait
Celledoni	Celledoni
Celledoni	Whitcombi		X
Cynopteri	Cynopteri		X
Djasiman	Djasiman		X
Djasiman	Sentot		X
Grippotyphosa	Grippotyphosa	X		X
Grippotyphosa	Ratnapura
Grippotyphosa	Valbuzzi			X
Hebdomadis	Hebdomadis	X
Hurstbridge	Hurstbridge
Icterohaemorrhagiae	Copenhageni		X
Icterohaemorrhagiae	Icterohaemorrhagiae	X	X	X	X
Icterohaemorrhagiae	Lai
Icterohaemorrhagiae	Mankarso
Javanica	Javanica
Javanica	Poi
Louisiana	Louisiana
Mini	Mini
Mini	Szwajizak
Panama	Magnus
Panama	Panama		X
Pomona	Pomona
Pyrogenes	Manilae
Pyrogenes	Pyrogenes		X	X
Sejroë	Hardjo			X
Pyrogenes	Hardjo-minis		X
Sejroë	Hardjominiswajezak		X
Sejroë	Istrica
Sejroë	Sejroë			X
Sejroë	Wolffi		X
Shermani	Shermani		X	X
Tarassovi	Hyos
Tarassovi	Tarassovi		X	X
(Unknown)	Varillal				X
Saprophytic	Saprophytic
Andamana	Andamana		X
Semaranga	Patoc		X
Semaranga	Semaranga
aAssumed (sg Icterohaemorrhagiae sv Copenhageni)
